# Supplementary material for: Tumor vascular status controls oxygen delivery facilitated by infused polymerized hemoglobins with varying oxygen affinity
Source: PLOS journal article supplement (doi:10.1371/journal.pcbi.1008157), 2020-08-20
Supplement: S4 (10.1371/journal.pcbi.1008157.s004) [file journal.pcbi.1008157.s004]

## S4. Appendix. Comparison of mouse and human host tissue oxygenation and blood flow.

Donald A. Belcher<sup>1</sup>, Alfredo Lucas<sup>2</sup>, Pedro Cabrales<sup>2</sup>, Andre F. Palmer<sup>1</sup>,

<sup>1</sup> William G. Lowrie Department of Chemical and Biomolecular Engineering, The Ohio State University, Columbus, Ohio, USA

<sup>2</sup> Department of Bioengineering, University of California, San Diego, La Jolla, CA, USA

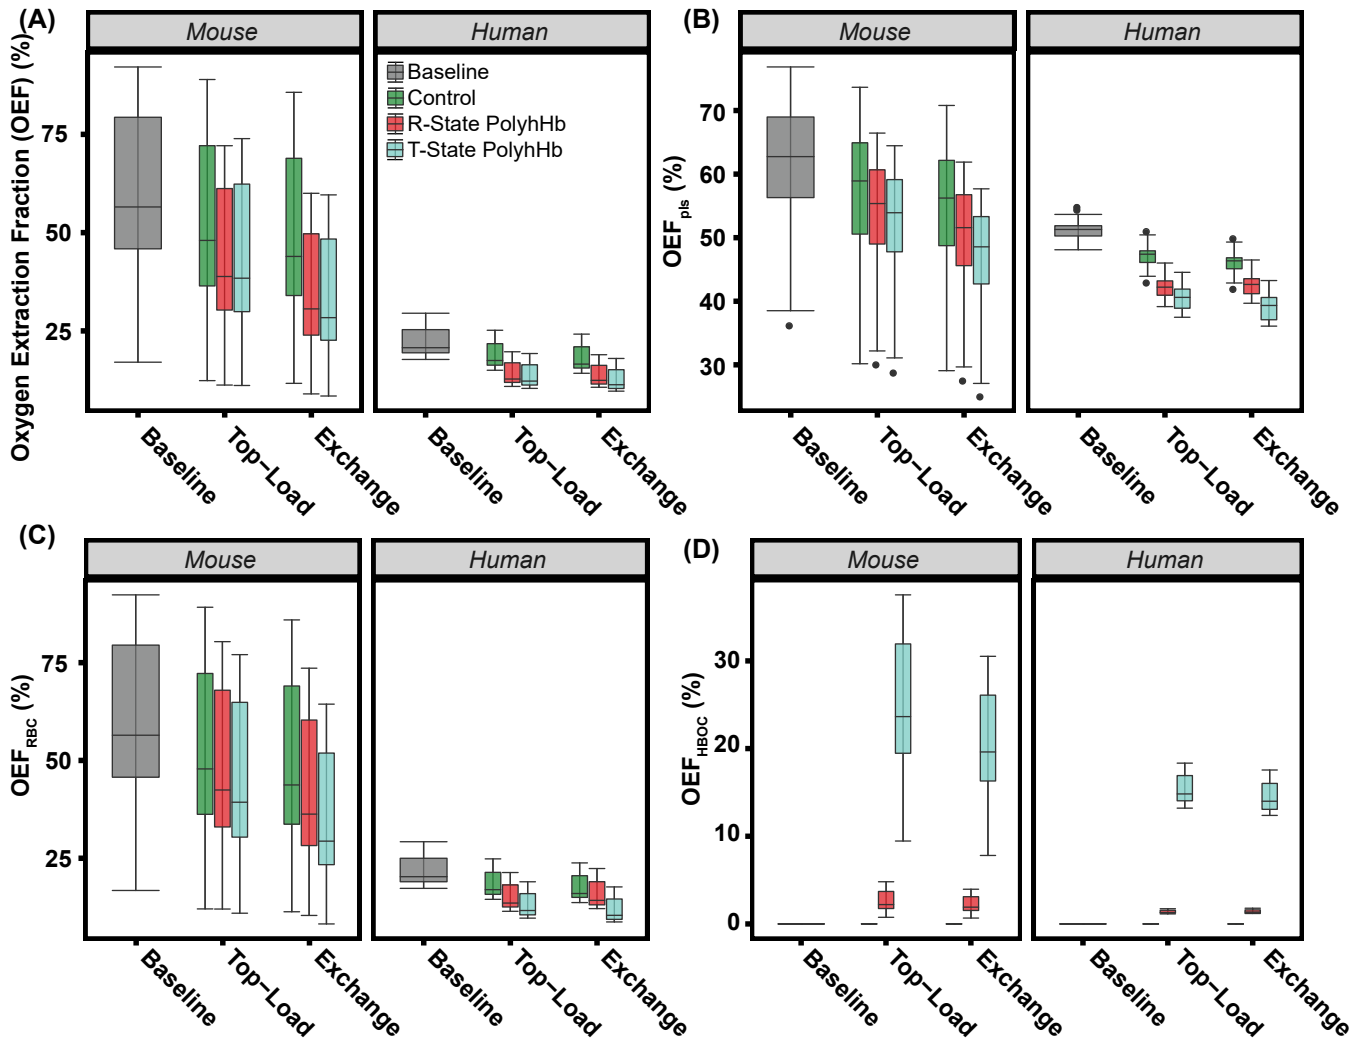

**Fig A. Changes in oxygen ( $O_2$ ) extraction fraction (OEF) for the simulated polymerized human hemoglobin (hHb) (PolyhHb) enhanced transfusion model in host tissue.** Variations in (A) OEF, (B)  $O_2$  extraction fraction from plasma (OEF<sub>plas</sub>), (C)  $O_2$  extraction fraction from hemoglobin (Hb) in red blood cells (RBCs) (OEF<sub>Hb</sub>)  $O_2$  saturation in RBC, and (D)  $O_2$  extraction fraction from Hb-based  $O_2$  carriers (HBOCs) (OEF<sub>HBOC</sub>) (HBOC) concentration transfusion of the control, 30:1 relaxed quaternary state (R-State) PolyhHb, and the tense quaternary state (T-State) PolyhHb.

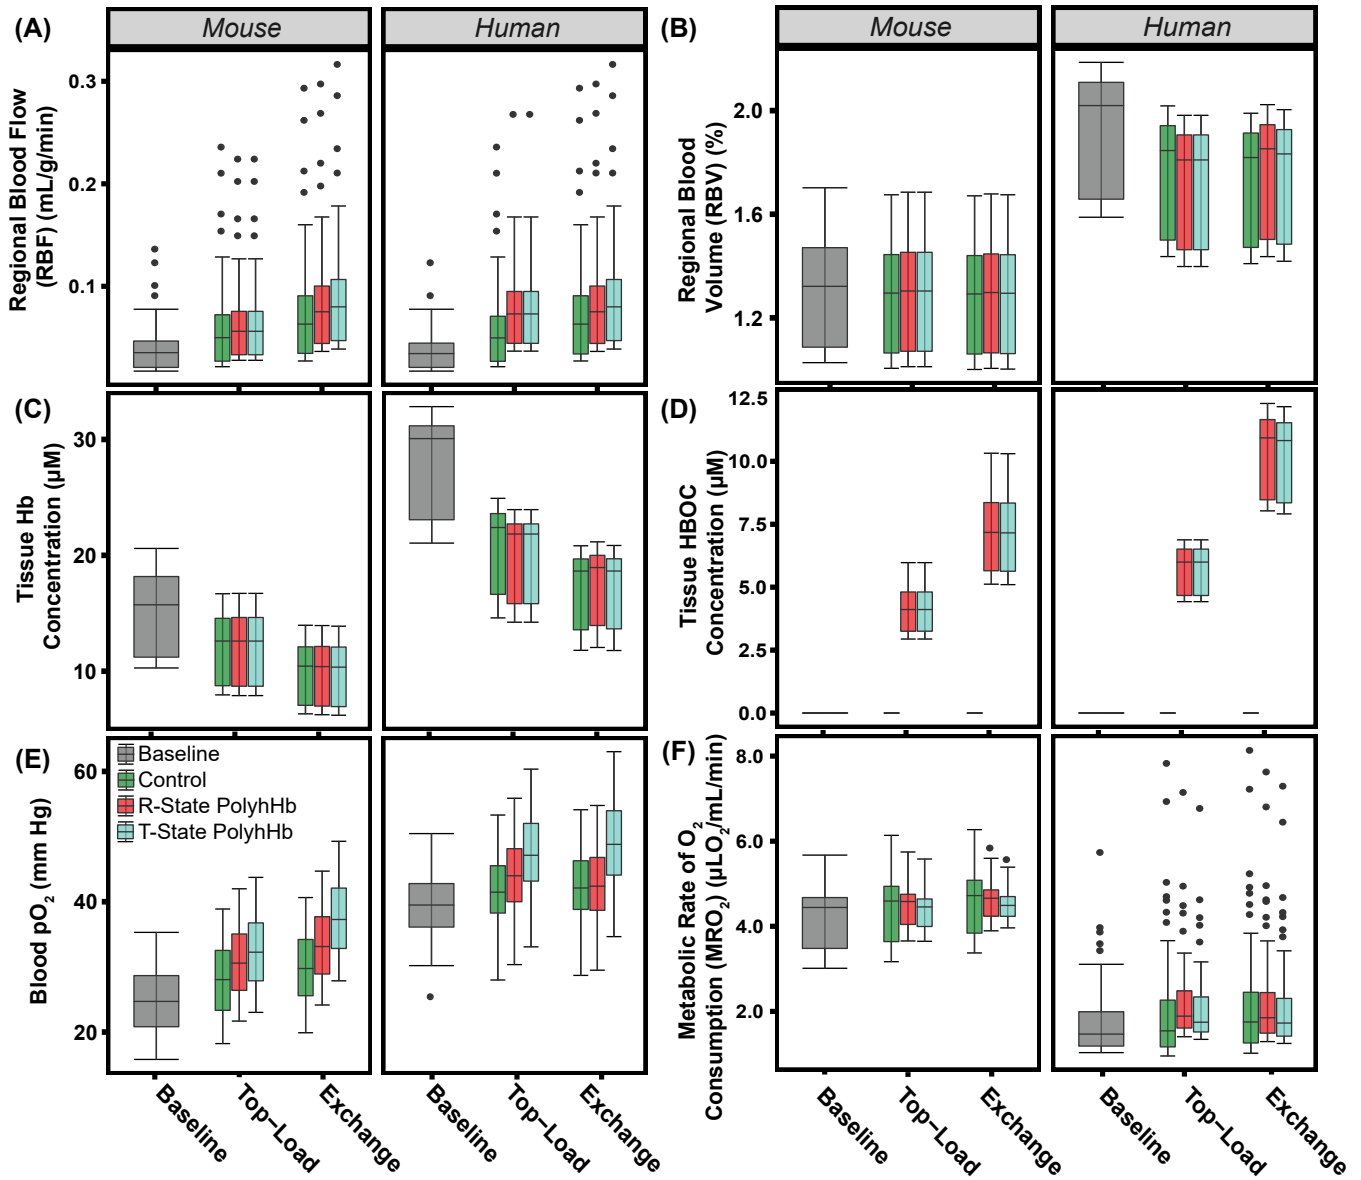

**Fig B. Changes in the tumor vascular architecture and Hb/PolyhHb concentrations for the simulated PolyhHb enhanced transfusion model in host tissue.** Variations in host tissue (A) regional blood flow ( $RBF$ ), (B) regional blood volume ( $RBV$ ), (C) Hb concentration in the tissue ( $C_{Hb,tis}$ ), (D) PolyhHb (HbOC) concentration, (E) blood partial pressure of dissolved  $\text{O}_2$  ( $p\text{O}_2$ ), and (F) metabolic rate of  $\text{O}_2$  consumption ( $MRO_2$ ) for the baseline, top-load, and exchange transfusion of the control, 30:1 R-State PolyhHb, and the T-State PolyhHb.
